# Supplementary material for: Incidence, genetic diversity, and antimicrobial resistance profiles of Vibrio parahaemolyticus in seafood in Bangkok and eastern Thailand
Source: PeerJ. 2023 May 11;11:e15283. doi: 10.7717/peerj.15283 (PMC10183165; doi:10.7717/peerj.15283)
Supplement: Supplemental Information 7 — The raw data of the antimicrobial susceptibility test performed on the 36 Vibrio parahaemolyticus isolates against 27 agents from 5 antimicrobial categories. [file peerj-11-15283-s007.xlsx]

## Sheet: MIC value combine
Received date	Labe Code	Amikacin	Amoxicillin/ Clavulanic Acid	Ampicillin	Ampicillin/ Sulbactam	Azithromycin	Cefepime	Cefotaxime	Cefoxitin	Ceftazidime	Ceftriaxone	Cefuroxime (sodium)	Chloramphenicol	Ciprofloxacin	Colistin	Doripenem	Ertapenem	Gentamicin	Imipenem	Levofloxacin	Meropenem	Nalidixic Acid	Netilmicin	Piperacillin/ Tazobactam	Streptomycin	Sulfisoxazole	Tetracycline	Trimethoprim/ Sulfamethoxazole
2018	VP 7	≤ 8	4	> 32	≤ 4	≤ 0.25	≤ 1	≤ 1	8	≤ 1	≤ 0.25	16	≤ 2	0.25	> 8	≤ 0.5	≤ 0.5	2	≤ 0.5	0.25	≤ 0.06	1	≤ 8	≤ 8	16	64	≤ 4	≤ 0.12
2018	VP 11	≤ 8	2	> 32	≤ 4	≤ 0.25	≤ 1	≤ 1	4	≤ 1	≤ 0.25	16	≤ 2	0.25	> 8	≤ 0.5	≤ 0.5	2	≤ 0.5	0.25	≤ 0.06	≤ 0.5	≤ 8	≤ 8	32	64	≤ 4	≤ 0.12
2018	VP 16	≤ 8	2	> 32	≤ 4	0.5	≤ 1	≤ 1	8	≤ 1	≤ 0.25	16	≤ 2	0.12	> 8	≤ 0.5	≤ 0.5	2	≤ 0.5	0.12	≤ 0.06	≤ 0.5	≤ 8	≤ 8	32	64	≤ 4	≤ 0.12
2018	VP 17	≤ 8	2	32	≤ 4	0.5	≤ 1	≤ 1	4	≤ 1	≤ 0.25	16	≤ 2	0.12	> 8	≤ 0.5	≤ 0.5	1	≤ 0.5	0.12	≤ 0.06	≤ 0.5	≤ 8	≤ 8	16	128	≤ 4	≤ 0.12
2018	VP 26	≤ 8	2	> 32	≤ 4	0.5	≤ 1	≤ 1	8	≤ 1	≤ 0.25	16	≤ 2	0.25	> 8	≤ 0.5	≤ 0.5	2	≤ 0.5	0.25	≤ 0.06	1	≤ 8	≤ 8	32	256	≤ 4	≤ 0.12
2018	VP 31	≤ 8	2	16	≤ 4	≤ 0.25	≤ 1	≤ 1	8	≤ 1	≤ 0.25	16	≤ 2	0.12	4	≤ 0.5	≤ 0.5	1	≤ 0.5	0.12	≤ 0.06	≤ 0.5	≤ 8	≤ 8	16	64	≤ 4	≤ 0.12
2018	VP 39	≤ 8	2	32	≤ 4	≤ 0.25	≤ 1	≤ 1	16	≤ 1	≤ 0.25	> 16	≤ 2	0.25	> 8	≤ 0.5	≤ 0.5	2	≤ 0.5	0.12	≤ 0.06	≤ 0.5	≤ 8	≤ 8	16	256	≤ 4	≤ 0.12
2018	VP 41	≤ 8	2	> 32	≤ 4	0.5	≤ 1	≤ 1	8	≤ 1	≤ 0.25	16	≤ 2	0.12	> 8	≤ 0.5	≤ 0.5	1	≤ 0.5	0.12	≤ 0.06	≤ 0.5	≤ 8	≤ 8	16	128	≤ 4	≤ 0.12
2018	VP 42	≤ 8	2	> 32	8	0.5	> 32	> 32	8	16	> 64	> 16	≤ 2	0.12	> 8	≤ 0.5	≤ 0.5	1	≤ 0.5	0.12	≤ 0.06	≤ 0.5	≤ 8	≤ 8	16	> 256	≤ 4	0.5
2018	VP 46	≤ 8	2	16	≤ 4	≤ 0.25	≤ 1	≤ 1	8	≤ 1	≤ 0.25	16	≤ 2	0.12	8	≤ 0.5	≤ 0.5	2	≤ 0.5	0.12	≤ 0.06	≤ 0.5	≤ 8	≤ 8	16	128	≤ 4	≤ 0.12
2018	VP1/1	≤ 8	2	> 32	≤ 4	0.5	≤ 1	≤ 1	4	≤ 1	≤ 0.25	16	≤ 2	0.12	> 8	≤ 0.5	≤ 0.5	2	≤ 0.5	0.12	≤ 0.06	≤ 0.5	≤ 8	≤ 8	32	64	≤ 4	≤ 0.12
2018	VP 1/2	≤ 8	2	32	≤ 4	≤ 0.25	≤ 1	≤ 1	8	≤ 1	≤ 0.25	16	≤ 2	0.12	> 8	≤ 0.5	≤ 0.5	2	≤ 0.5	0.12	≤ 0.06	≤ 0.5	≤ 8	≤ 8	16	64	≤ 4	≤ 0.12
2018	VP 3/1	≤ 8	4	32	≤ 4	0.5	≤ 1	≤ 1	8	≤ 1	≤ 0.25	16	≤ 2	0.12	> 8	≤ 0.5	≤ 0.5	2	≤ 0.5	0.12	≤ 0.06	1	≤ 8	≤ 8	32	128	≤ 4	≤ 0.12
2018	VP 18/2	≤ 8	≤ 1	32	≤ 4	≤ 0.25	≤ 1	≤ 1	4	≤ 1	≤ 0.25	≤ 8	≤ 2	0.06	4	≤ 0.5	≤ 0.5	2	≤ 0.5	0.12	≤ 0.06	≤ 0.5	≤ 8	≤ 8	16	32	≤ 4	≤ 0.12
2018	VP 23/1	≤ 8	2	16	≤ 4	≤ 0.25	≤ 1	≤ 1	4	≤ 1	≤ 0.25	≤ 8	≤ 2	0.12	8	≤ 0.5	≤ 0.5	2	≤ 0.5	0.12	≤ 0.06	≤ 0.5	≤ 8	≤ 8	16	≤ 16	≤ 4	≤ 0.12
2018	VP 25/1	≤ 8	2	32	≤ 4	0.5	≤ 1	≤ 1	8	≤ 1	≤ 0.25	16	≤ 2	0.12	> 8	≤ 0.5	≤ 0.5	2	≤ 0.5	0.12	≤ 0.06	≤ 0.5	≤ 8	≤ 8	16	64	≤ 4	≤ 0.12
2018	VP 30/2	≤ 8	4	> 32	≤ 4	0.5	≤ 1	≤ 1	8	≤ 1	≤ 0.25	16	≤ 2	0.25	> 8	≤ 0.5	≤ 0.5	2	≤ 0.5	0.25	≤ 0.06	1	≤ 8	≤ 8	16	32	≤ 4	≤ 0.12
2018	VP 35/2	≤ 8	2	> 32	≤ 4	0.5	≤ 1	≤ 1	8	≤ 1	≤ 0.25	16	≤ 2	0.12	> 8	≤ 0.5	≤ 0.5	2	≤ 0.5	0.12	≤ 0.06	≤ 0.5	≤ 8	≤ 8	16	128	≤ 4	≤ 0.12
2018	VP 37/2	≤ 8	2	32	≤ 4	≤ 0.25	≤ 1	≤ 1	4	≤ 1	≤ 0.25	16	≤ 2	0.06	> 8	≤ 0.5	≤ 0.5	2	≤ 0.5	≤ 0.06	≤ 0.06	≤ 0.5	≤ 8	≤ 8	16	64	≤ 4	≤ 0.12
2013	SS4-002	≤ 8	2	32	≤ 4	≤ 0.25	≤ 1	≤ 1	8	≤ 1	≤ 0.25	16	≤ 2	0.25	> 8	≤ 0.5	≤ 0.5	1	≤ 0.5	0.12	≤ 0.06	1	≤ 8	≤ 8	16	> 256	≤ 4	≤ 0.12
2013	SS4-003	≤ 8	2	32	≤ 4	≤ 0.25	≤ 1	≤ 1	8	≤ 1	≤ 0.25	>16	≤ 2	0.25	> 8	≤ 0.5	≤ 0.5	2	≤ 0.5	0.12	≤ 0.06	≤ 0.5	≤ 8	≤ 8	16	64	≤ 4	≤ 0.12
2013	SS4-008	≤ 8	2	32	≤ 4	≤ 0.25	≤ 1	≤ 1	8	≤ 1	≤ 0.25	≤ 8	≤ 2	0.12	> 8	≤ 0.5	≤ 0.5	4	≤ 0.5	≤ 0.06	≤ 0.06	≤ 0.5	≤ 8	≤ 8	16	64	≤ 4	≤ 0.12
2013	SS4-009	≤ 8	2	32	≤ 4	≤ 0.25	≤ 1	≤ 1	8	≤ 1	≤ 0.25	16	≤ 2	0.06	> 8	≤ 0.5	≤ 0.5	2	≤ 0.5	≤ 0.06	≤ 0.06	≤ 0.5	≤ 8	≤ 8	32	32	≤ 4	≤ 0.12
2013	SS4-010	≤ 8	4	32	≤ 4	≤ 0.25	≤ 1	≤ 1	8	≤ 1	≤ 0.25	16	≤ 2	0.12	> 8	≤ 0.5	≤ 0.5	2	≤ 0.5	0.12	≤ 0.06	≤ 0.5	≤ 8	≤ 8	16	64	≤ 4	≤ 0.12
2013	SS4-012	≤ 8	2	32	≤ 4	≤ 0.25	≤ 1	≤ 1	8	≤ 1	≤ 0.25	16	≤ 2	0.12	> 8	≤ 0.5	≤ 0.5	2	≤ 0.5	0.12	≤ 0.06	≤ 0.5	≤ 8	≤ 8	16	32	≤ 4	≤ 0.12
2013	SS4-014	≤ 8	2	32	≤ 4	≤ 0.25	≤ 1	≤ 1	8	≤ 1	≤ 0.25	16	≤ 2	0.12	> 8	≤ 0.5	≤ 0.5	2	≤ 0.5	0.12	≤ 0.06	1	≤ 8	≤ 8	16	32	≤ 4	≤ 0.12
2013	SS4-016	≤ 8	2	16	≤ 4	≤ 0.25	≤ 1	≤ 1	8	≤ 1	≤ 0.25	16	≤ 2	0.12	> 8	≤ 0.5	≤ 0.5	2	≤ 0.5	0.12	≤ 0.06	1	≤ 8	≤ 8	16	64	≤ 4	≤ 0.12
2013	SS4-017	≤ 8	2	16	≤ 4	≤ 0.25	≤ 1	≤ 1	8	≤ 1	≤ 0.25	16	≤ 2	0.12	> 8	≤ 0.5	≤ 0.5	1	≤ 0.5	0.12	≤ 0.06	≤ 0.5	≤ 8	≤ 8	16	64	≤ 4	≤ 0.12
2013	SS4-082	≤ 8	2	> 32	≤ 4	≤ 0.25	≤ 1	≤ 1	8	≤ 1	≤ 0.25	16	≤ 2	0.12	> 8	≤ 0.5	≤ 0.5	2	≤ 0.5	0.12	≤ 0.06	≤ 0.5	≤ 8	≤ 8	16	> 256	≤ 4	≤ 0.12
2013	SS4-083	≤ 8	2	32	≤ 4	≤ 0.25	≤ 1	≤ 1	8	≤ 1	≤ 0.25	16	≤ 2	0.12	> 8	≤ 0.5	≤ 0.5	2	≤ 0.5	0.12	≤ 0.06	1	≤ 8	≤ 8	16	32	≤ 4	≤ 0.12
2013	SS4-084	≤ 8	2	32	≤ 4	≤ 0.25	≤ 1	≤ 1	8	≤ 1	≤ 0.25	16	≤ 2	0.12	> 8	≤ 0.5	≤ 0.5	4	≤ 0.5	0.12	≤ 0.06	1	≤ 8	≤ 8	16	32	≤ 4	≤ 0.12
2013	SS4-099	≤ 8	2	32	≤ 4	≤ 0.25	≤ 1	≤ 1	8	≤ 1	≤ 0.25	16	≤ 2	0.12	> 8	≤ 0.5	≤ 0.5	2	≤ 0.5	0.12	≤ 0.06	≤ 0.5	≤ 8	≤ 8	16	≤ 16	≤ 4	≤ 0.12
2013	SS4-179	≤ 8	2	16	≤ 4	≤ 0.25	≤ 1	≤ 1	4	≤ 1	≤ 0.25	≤ 8	≤ 2	0.06	> 8	≤ 0.5	≤ 0.5	4	≤ 0.5	≤ 0.06	≤ 0.06	1	≤ 8	≤ 8	16	64	≤ 4	≤ 0.12
2013	SS4-190	≤ 8	2	32	≤ 4	≤ 0.25	≤ 1	≤ 1	8	≤ 1	≤ 0.25	16	≤ 2	0.12	> 8	≤ 0.5	≤ 0.5	1	≤ 0.5	0.12	≤ 0.06	≤ 0.5	≤ 8	≤ 8	16	64	≤ 4	≤ 0.12
2013	SS4-218	≤ 8	2	> 32	≤ 4	≤ 0.25	≤ 1	≤ 1	8	≤ 1	≤ 0.25	16	≤ 2	0.12	> 8	≤ 0.5	≤ 0.5	2	≤ 0.5	0.12	≤ 0.06	≤ 0.5	≤ 8	≤ 8	16	32	≤ 4	≤ 0.12
2013	VP 10/5	≤ 8	2	> 32	≤ 4	≤ 0.25	≤ 1	≤ 1	8	≤ 1	≤ 0.25	16	≤ 2	0.25	> 8	≤ 0.5	≤ 0.5	2	≤ 0.5	0.12	≤ 0.06	2	≤ 8	≤ 8	16	32	≤ 4	≤ 0.12
